# Supplementary material
Source: Oxford University Press journal article supplement (doi:10.1093/g3journal_jkac150)
Supplement: jkac150_supplementary_figure_s1.pdf [file jkac150_supplementary_figure_s1.pdf]

**Figure S1**

a)

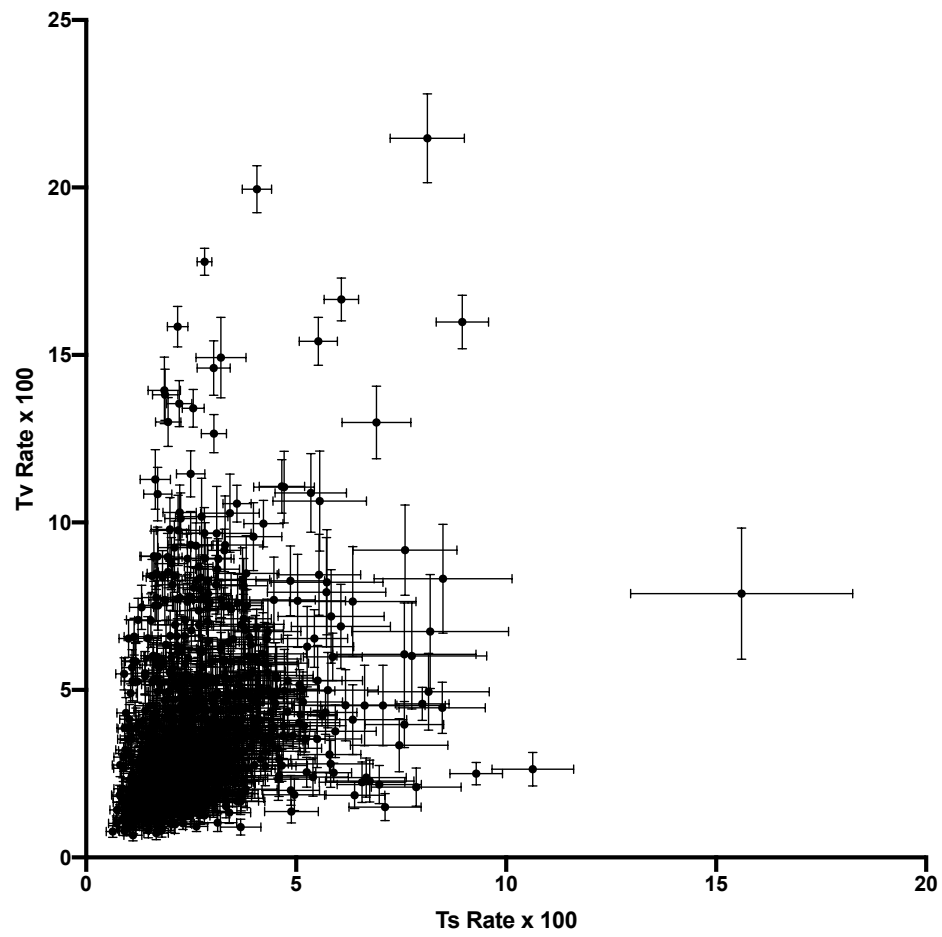

b)

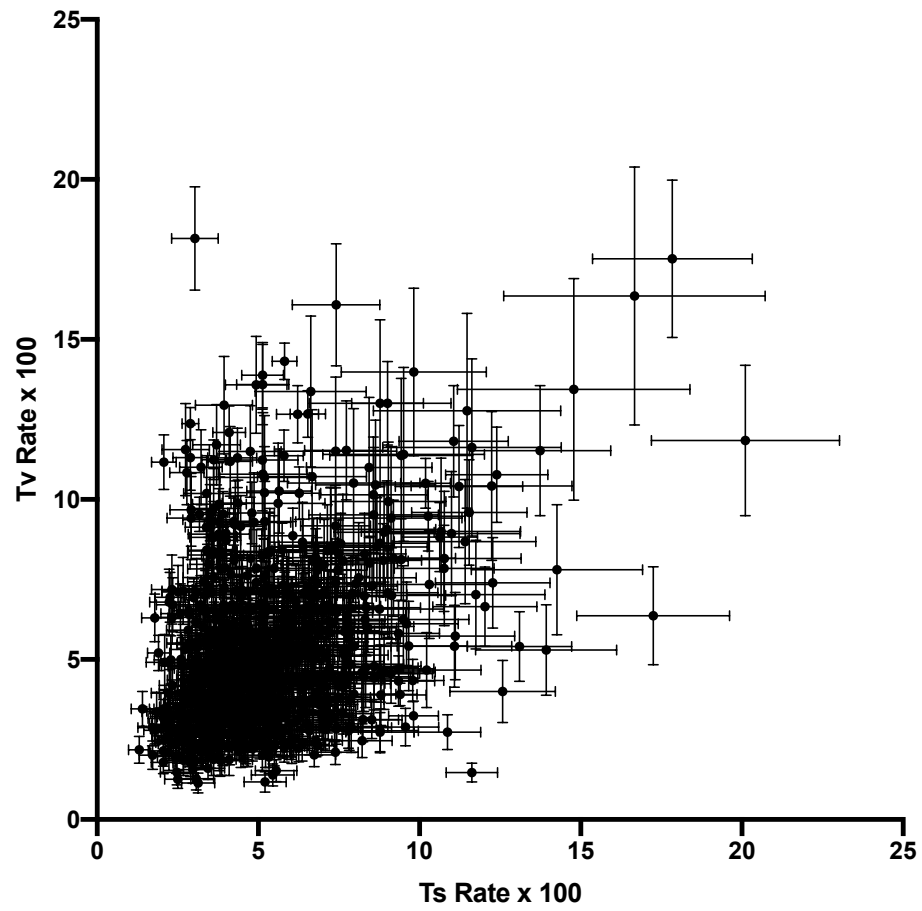

Figure Legend: Rates of substitution with 95% CI from T (a) and C (b) across hexanucleotide contexts with at least 50 transitions and 50 transversions.
