# Supplementary material
Source: Oxford University Press journal article supplement (doi:10.1093/g3journal_jkac150)
Supplement: jkac150_supplementary_figure_s2.pdf [file jkac150_supplementary_figure_s2.pdf]

Figure S2

a)

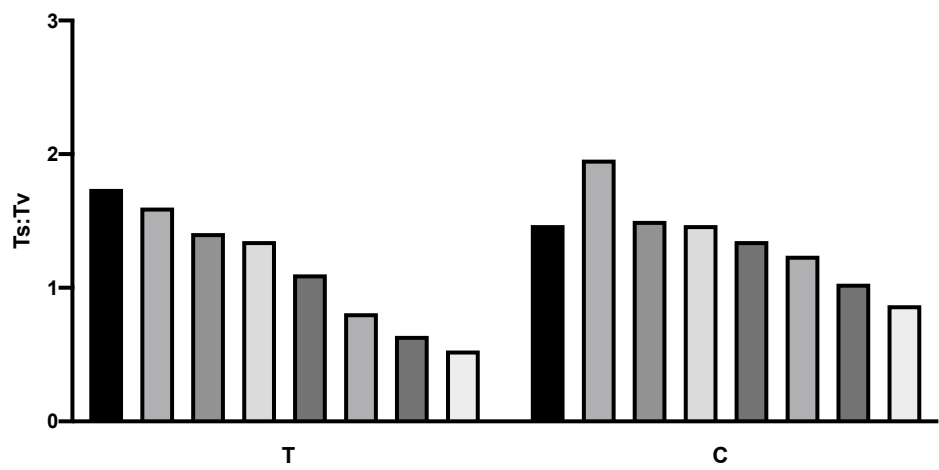

b)

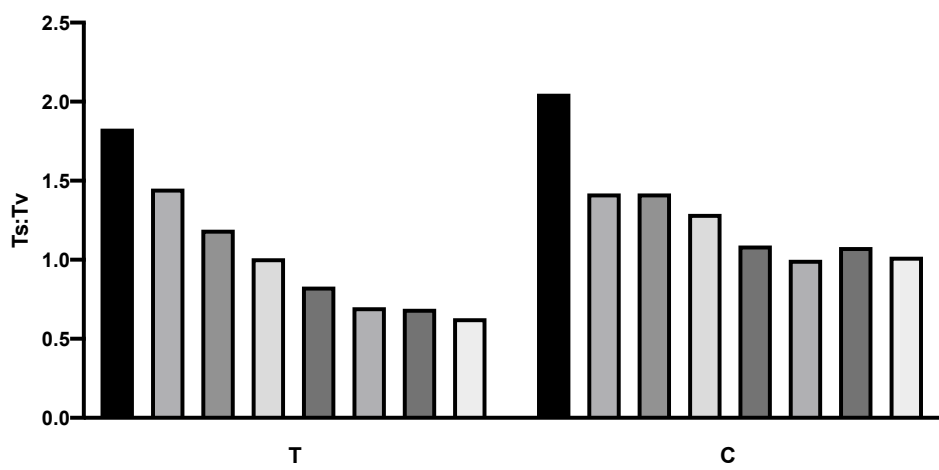

c)

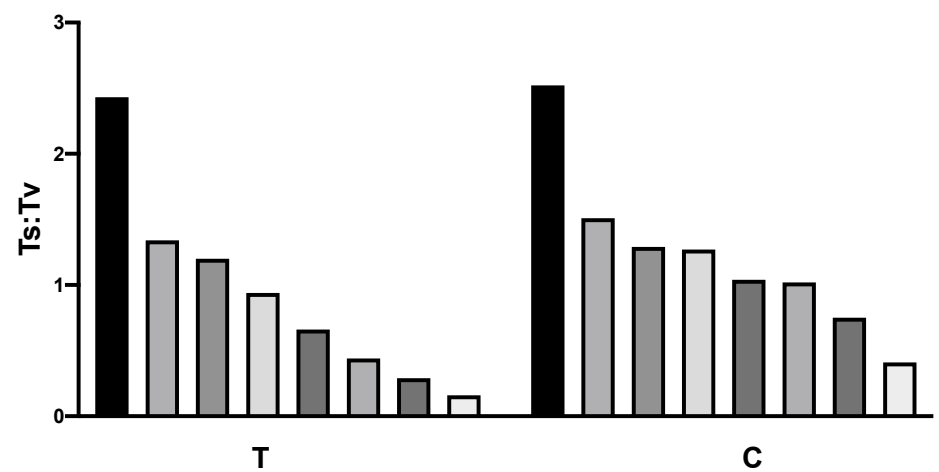

Figure Legend: Ts:Tv for substitutions of T and C relative to the ATI (a), RI (b), and the RATI (c) values of the hexanucleotide context. In each case the contexts are grouped into 8 categories with values of 0-3, 4-7, 8-11, 12-15, 16-19, 20-23, 24-27 and 28 from left to right.
