# Supplementary material
Source: Oxford University Press journal article supplement (doi:10.1093/g3journal_jkac150)
Supplement: jkac150_supplementary_figure_s3.pdf [file jkac150_supplementary_figure_s3.pdf]

**Figure S3**

a)

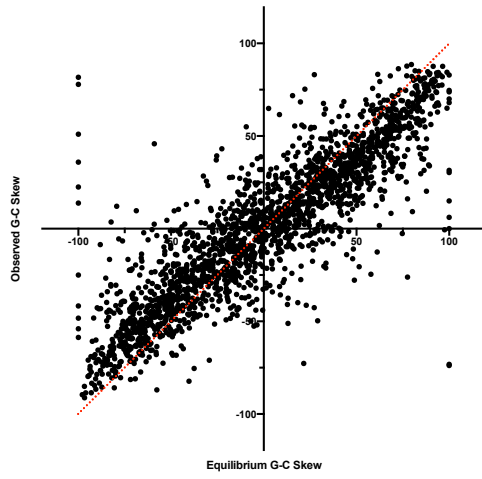

b)

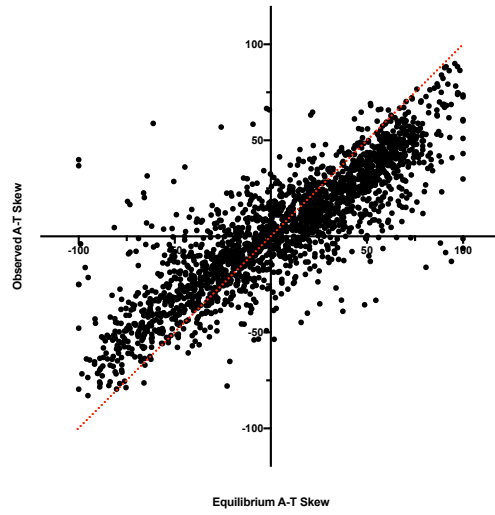

c)

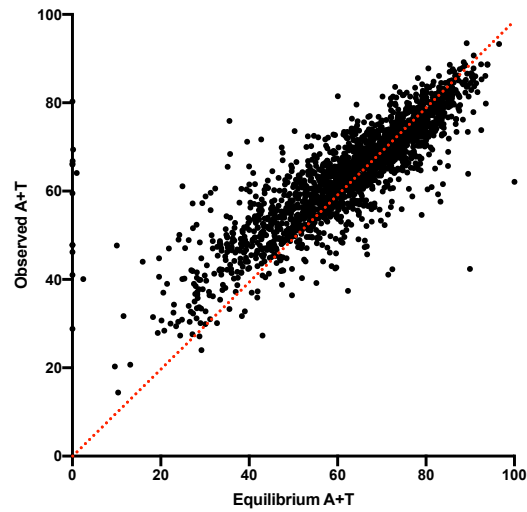

Figure Legend: For each context the stationary vector of the transition matrix was used to calculate predicted equilibrium base composition within that hexanucleotide. Compositions plotted are (a) A-T skew (b) G-C skew, and (c) A+T content. The equality line for each is shown in red.
